# Supplementary material
Source: publisher site journal article supplement (https://www.kjim.org/upload/media/kjim-2025-130-Supplementary-Table-1.pdf)
Supplement: Supplementary file 1 [file kjim-2025-130-Supplementary-Table-1.pdf]

**Supplementary Table 1. Laboratory findings during the study period**

|                             |     | Subject #1                           |                           |            |                  | Subject #2                           |                           |            |                  | Subject #3                           |                           |            |                  |
|-----------------------------|-----|--------------------------------------|---------------------------|------------|------------------|--------------------------------------|---------------------------|------------|------------------|--------------------------------------|---------------------------|------------|------------------|
|                             |     | Blood eosinophil (/mm <sup>3</sup> ) | FEV <sub>1</sub> (% pred) | FeNO (ppb) | Total IgE (U/mL) | Blood eosinophil (/mm <sup>3</sup> ) | FEV <sub>1</sub> (% pred) | FeNO (ppb) | Total IgE (U/mL) | Blood eosinophil (/mm <sup>3</sup> ) | FEV <sub>1</sub> (% pred) | FeNO (ppb) | Total IgE (U/mL) |
| Mepolizumab treatment phase | V1  | 407                                  |                           |            |                  | 271                                  |                           |            |                  | 188                                  |                           |            |                  |
|                             | V2  | 41                                   |                           |            |                  | 30                                   |                           |            |                  | 0                                    |                           |            |                  |
|                             | V3  | 32                                   | 81                        |            | 221.4            | 0                                    | 98                        |            | 455.0            | 0                                    | 90                        |            | 96.5             |
|                             | V4  | 0                                    |                           |            |                  | 0                                    |                           |            |                  | 72                                   |                           |            |                  |
|                             | V5  | 0                                    |                           |            |                  | 61                                   |                           |            |                  | 58                                   |                           |            |                  |
|                             | V6  | 0                                    | 81                        | 36         | 152.6            | 41                                   | 104                       | 77         | 378.6            | 42                                   | 86                        | 171        | 149.6            |
|                             | V7  | 113                                  |                           |            |                  | 18                                   |                           |            |                  | 22                                   |                           |            |                  |
|                             | V8  | 90                                   |                           |            |                  | 0                                    |                           |            |                  | 80                                   |                           |            |                  |
|                             | V9  | 43                                   | 83                        |            | 153.6            | 0                                    | 108                       |            | 420.6            | 51                                   | 73                        |            | 167.8            |
|                             | V10 | 0                                    |                           |            |                  | 42                                   |                           |            |                  | 39                                   |                           |            |                  |
|                             | V11 | 27                                   |                           |            |                  | 51                                   |                           |            |                  | 18                                   |                           |            |                  |
|                             | V12 | 38                                   | 86                        | 31         | 159.7            | 19                                   | 108                       | 12         | 593.3            | 132                                  | 70                        | 246        | 164.7            |
| Follow-up phase             | V13 | 199                                  | 78                        |            | 165.0            | 71                                   | 107                       |            | 674.4            | 877                                  | 78                        |            | 142.7            |
|                             | V14 | 590                                  | 83                        | 18         | 182.5            | 461                                  | 104                       | N/A        | 454.9            | 752                                  | 78                        | 178        | 155.4            |
|                             | V15 | 222                                  | 92                        |            | 207.6            | 43                                   | 113                       |            | 290.3            | 662                                  | 68                        |            | 138.8            |
|                             | V16 | 449                                  | 89                        | 34         | 160.1            | 333                                  | 116                       | N/A        | 252.9            | 972                                  | 72                        | 128        | 175.3            |

FEV<sub>1</sub>, forced expiratory volume in 1 second; FeNO, fractional exhaled nitric oxide; IgE, immunoglobulin E; V, visit; N/A, not available.
